# Supplementary material for: Hierarchically porous AlPO-5-based microspheres as heterogeneous catalysts for the synthesis of 5-substituted 1H-tetrazoles via [3+2] cycloaddition
Source: Royal Society of Chemistry journal article supplement (doi:10.1039/c4nj00034j), 2014-01-01
Supplement: c4nj00034j1.pdf [file c4nj00034j1.pdf]

## Electronic Supplementary Information (ESI) for

# Hierarchically porous AIPO-5-based microspheres as heterogeneous catalysts for synthesis of 5-substituted 1H-tetrazoles via [3+2] cycloaddition

Dan Kong,<sup>a</sup> Yanyan Liu,<sup>a</sup> Juan Zhang,<sup>a</sup> Hongbian Li,<sup>b</sup> Xiangyu Wang,<sup>\*,a</sup> Guangyu Liu,<sup>a,c</sup> Baojun Li<sup>\*,a</sup> and Zheng Xu<sup>d</sup>

<sup>a</sup> Institute of Industrial Catalysis, College of Chemistry and Molecular Engineering, Zhengzhou University, 100 Science Road, Zhengzhou 450001, P R China

<sup>b</sup> National Center for Nanoscience and Technology, 11 Beiyitiao Street, Zhongguancun, Beijing 100190, P R China

<sup>c</sup> School of Chemistry and Chemical Engineering, Henan University of Technology, Zhengzhou 450001, P R China

<sup>d</sup> State Key Laboratory of Coordination Chemistry and Nanjing National Laboratory of Microstructure, Department of Chemistry and Chemical Engineering, Nanjing University, Nanjing 210093, P R China

\*Corresponding author. E-mail: lbjfc1@zzu.edu.cn and xiangyuwang@zzu.edu.cn

**Table S1.** Unit cell parameters for AIPO-5 and WAIPO-5.

| Sample  | a=b (Å) | C (Å) | V (Å <sup>3</sup> ) | ΔV (Å <sup>3</sup> ) |
|---------|---------|-------|---------------------|----------------------|
| AIPO-5  | 13.70   | 8.41  | 1367.20             | ~                    |
| WAIPO-5 | 13.72   | 8.40  | 1369.40             | 2.20                 |

V: unit cell volume, ΔV: unit cell volume change

**Table S2.** The location of FTIR absorption peaks calcined micropore aluminophosphates.

| Sample  | 1 (cm <sup>-1</sup> ) | 2 (cm <sup>-1</sup> ) | 3 (cm <sup>-1</sup> ) | 4 (cm <sup>-1</sup> ) | 5 (cm <sup>-1</sup> ) |
|---------|-----------------------|-----------------------|-----------------------|-----------------------|-----------------------|
| AIPO-5  | 466.17                | 635.99                | 706.52                | 1128.09               | 1650.78               |
| WAIPO-5 | 467.89                | 637.44                | 704.53                | 1113.68               | 1644.62               |

**Table S3.** The molar ratio of P, Al and W calculated from ICP results.

| Sample          | X <sup>a</sup> | Y <sup>a</sup> | Z <sup>a</sup> |
|-----------------|----------------|----------------|----------------|
| WAIPO-5 (gel)   | 0.488          | 0.488          | 0.024          |
| WAIPO-5 (solid) | 0.497          | 0.502          | 0.001          |

<sup>a</sup> The mole ratio: X=P/(P+Al+W), Y=Al/(P+Al+W), Z=W/(P+Al+W).

**Table S4.** Nitrogen sorption results of AIPO-5 and WAIPO-5.

| Sample  | S <sub>BET</sub> (m <sup>2</sup> g <sup>-1</sup> ) | V <sub>P</sub> (cm <sup>3</sup> g <sup>-1</sup> ) | D <sub>P</sub> <sup>D</sup> (nm) <sup>a</sup> |
|---------|----------------------------------------------------|---------------------------------------------------|-----------------------------------------------|
| AIPO-5  | 229.5                                              | 0.20                                              | 1.8                                           |
| WAIPO-5 | 245.4                                              | 0.21                                              | 1.7                                           |

<sup>a</sup> Pore diameter from desorption branch of isotherms.

**Table S5.** Formation of 5-phenyltetrazole using various reaction parameters<sup>a</sup>.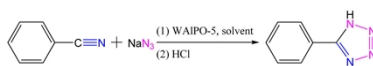

| Entry | Solvent                    | NaN <sub>3</sub> (mmol) | T (°C) | Yield (%)                         |
|-------|----------------------------|-------------------------|--------|-----------------------------------|
| 1     | DMF                        | 5.3                     | 100    | 87                                |
| 2     | DMF                        | 2.6                     | 120    | 19, 34                            |
| 3     | DMF                        | 5.3                     | 120    | 65 <sup>b</sup> , 92 <sup>c</sup> |
| 4     | DMF                        | 5.3                     | 130    | 40                                |
| 5     | water                      | 5.3                     | 100    | 2                                 |
| 6     | toluene                    | 5.3                     | 120    | 0                                 |
| 7     | DMSO                       | 5.3                     | 120    | 71                                |
| 8     | NMP                        | 5.3                     | 120    | 82                                |
| 9     | DMF/H <sub>2</sub> O (1/1) | 5.3                     | 120    | 32                                |
| 10    | SC CO <sub>2</sub> +DMF    | 5.3                     | 120    | 34 <sup>d</sup>                   |
| 11    | SC CO <sub>2</sub> +DMF    | 5.3                     | 120    | 31 <sup>e</sup>                   |

<sup>a</sup> *Reaction conditions:* benzonitrile (2.5 mmol), NaN<sub>3</sub> (2.6-5.3 mmol) and catalyst (0.26-0.78 mmol) in DMF (5mL) at 120 °C for 24 h.

<sup>b</sup> Reaction carried at 120 °C for 12 h.

<sup>c</sup> Reaction carried at 120 °C for 24 h.

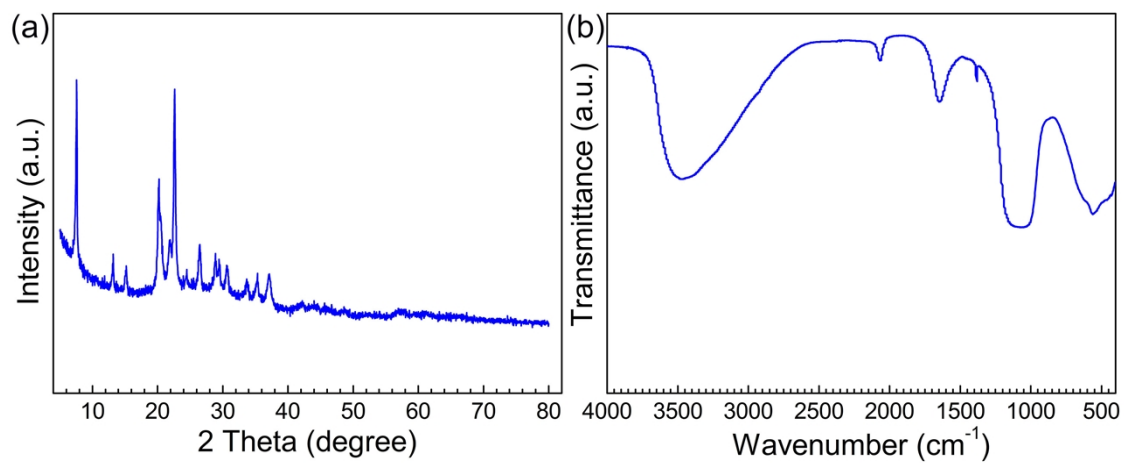

**Figure S1.** (a) XRD pattern and (b) FTIR spectrum of used WAIPO-5 microspheres.

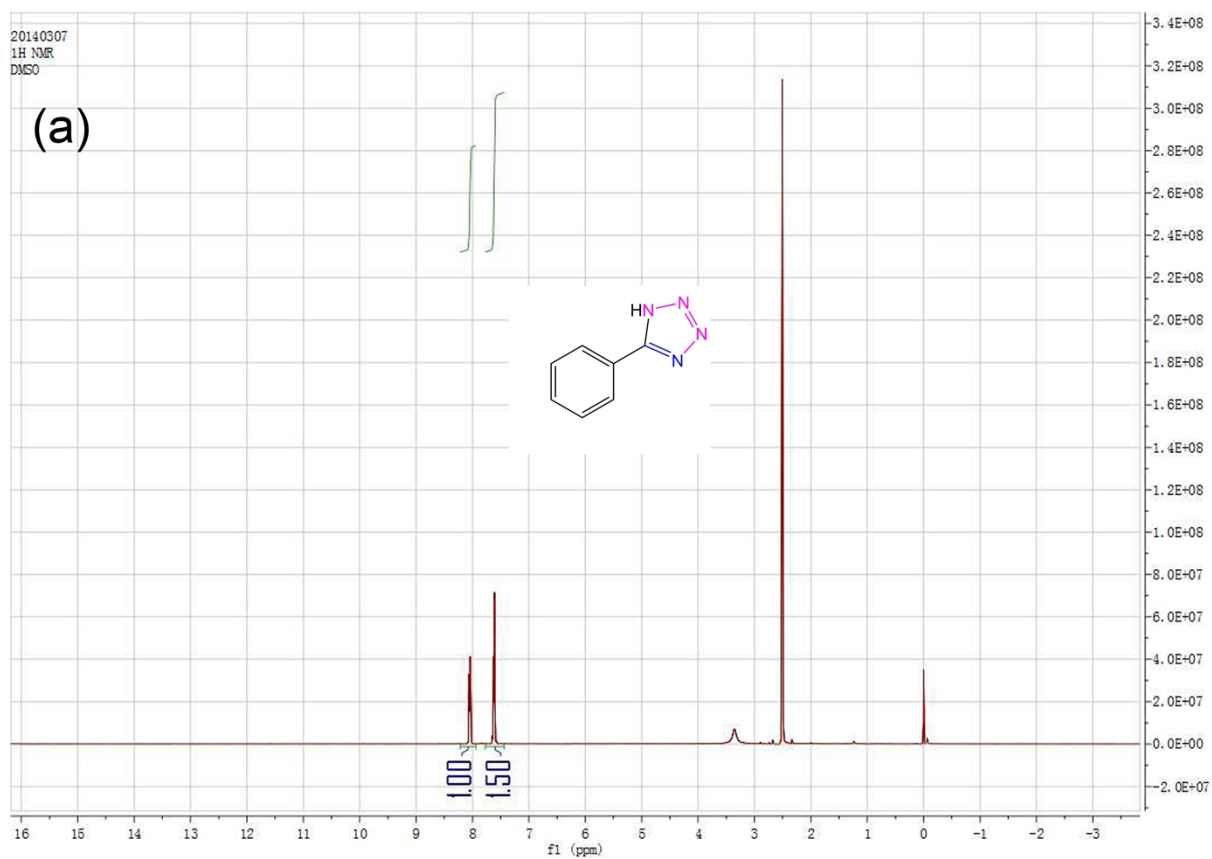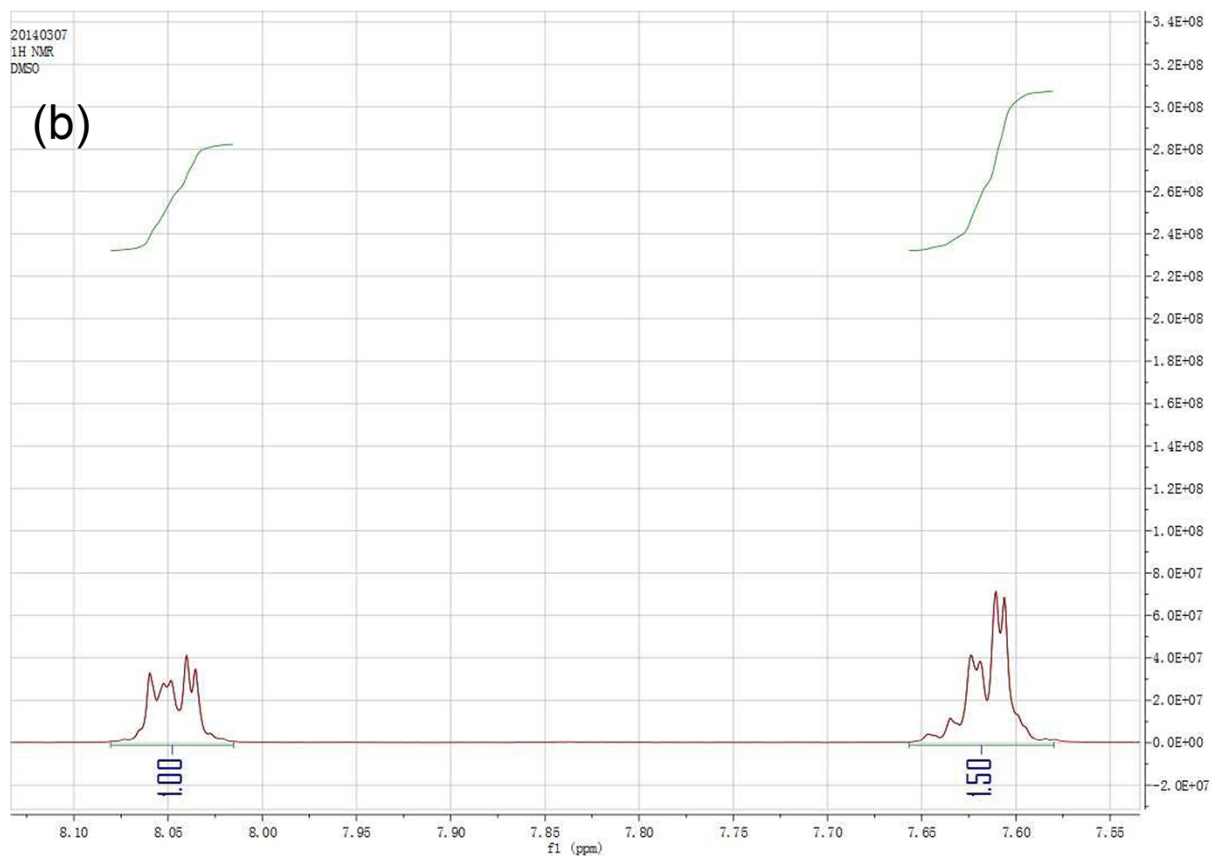

**Figure S2.** (a)  $^1\text{H}$  NMR spectrum of 5-phenyltetrazole and (b) the fine structure between 7.56-8.10 ppm.

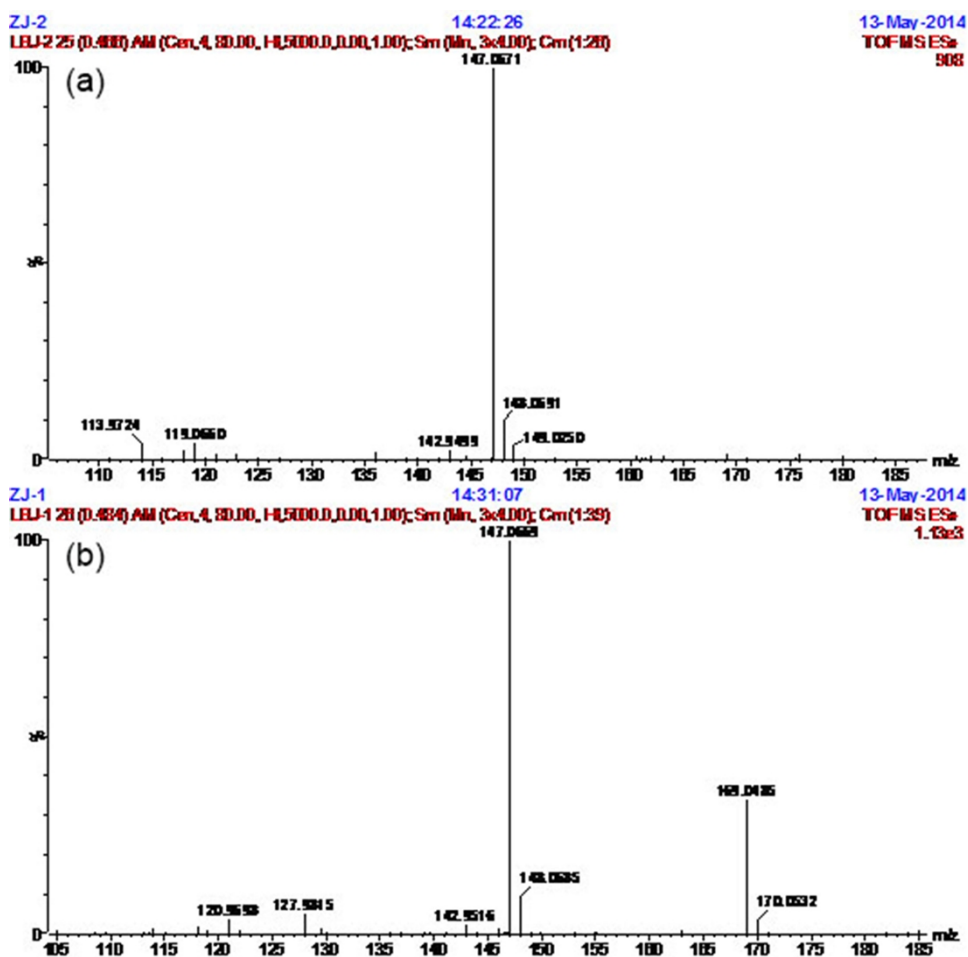

**Figure S3.** MS spectrum of (a) crude and (b) purified 5-phenyltetrazole synthesized from benzonitrile and sodium azide.
